# Supplementary material for: mbkmeans: Fast clustering for single cell data using mini-batch k-means
Source: PLOS journal article supplement (doi:10.1371/journal.pcbi.1008625), 2021-01-26

# Performance of accuracy with increasing sizes of simulated scRNA-seq datasets using a desktop

Algorithm — k-means — mbkmeans — mbkmeans (HDF5)

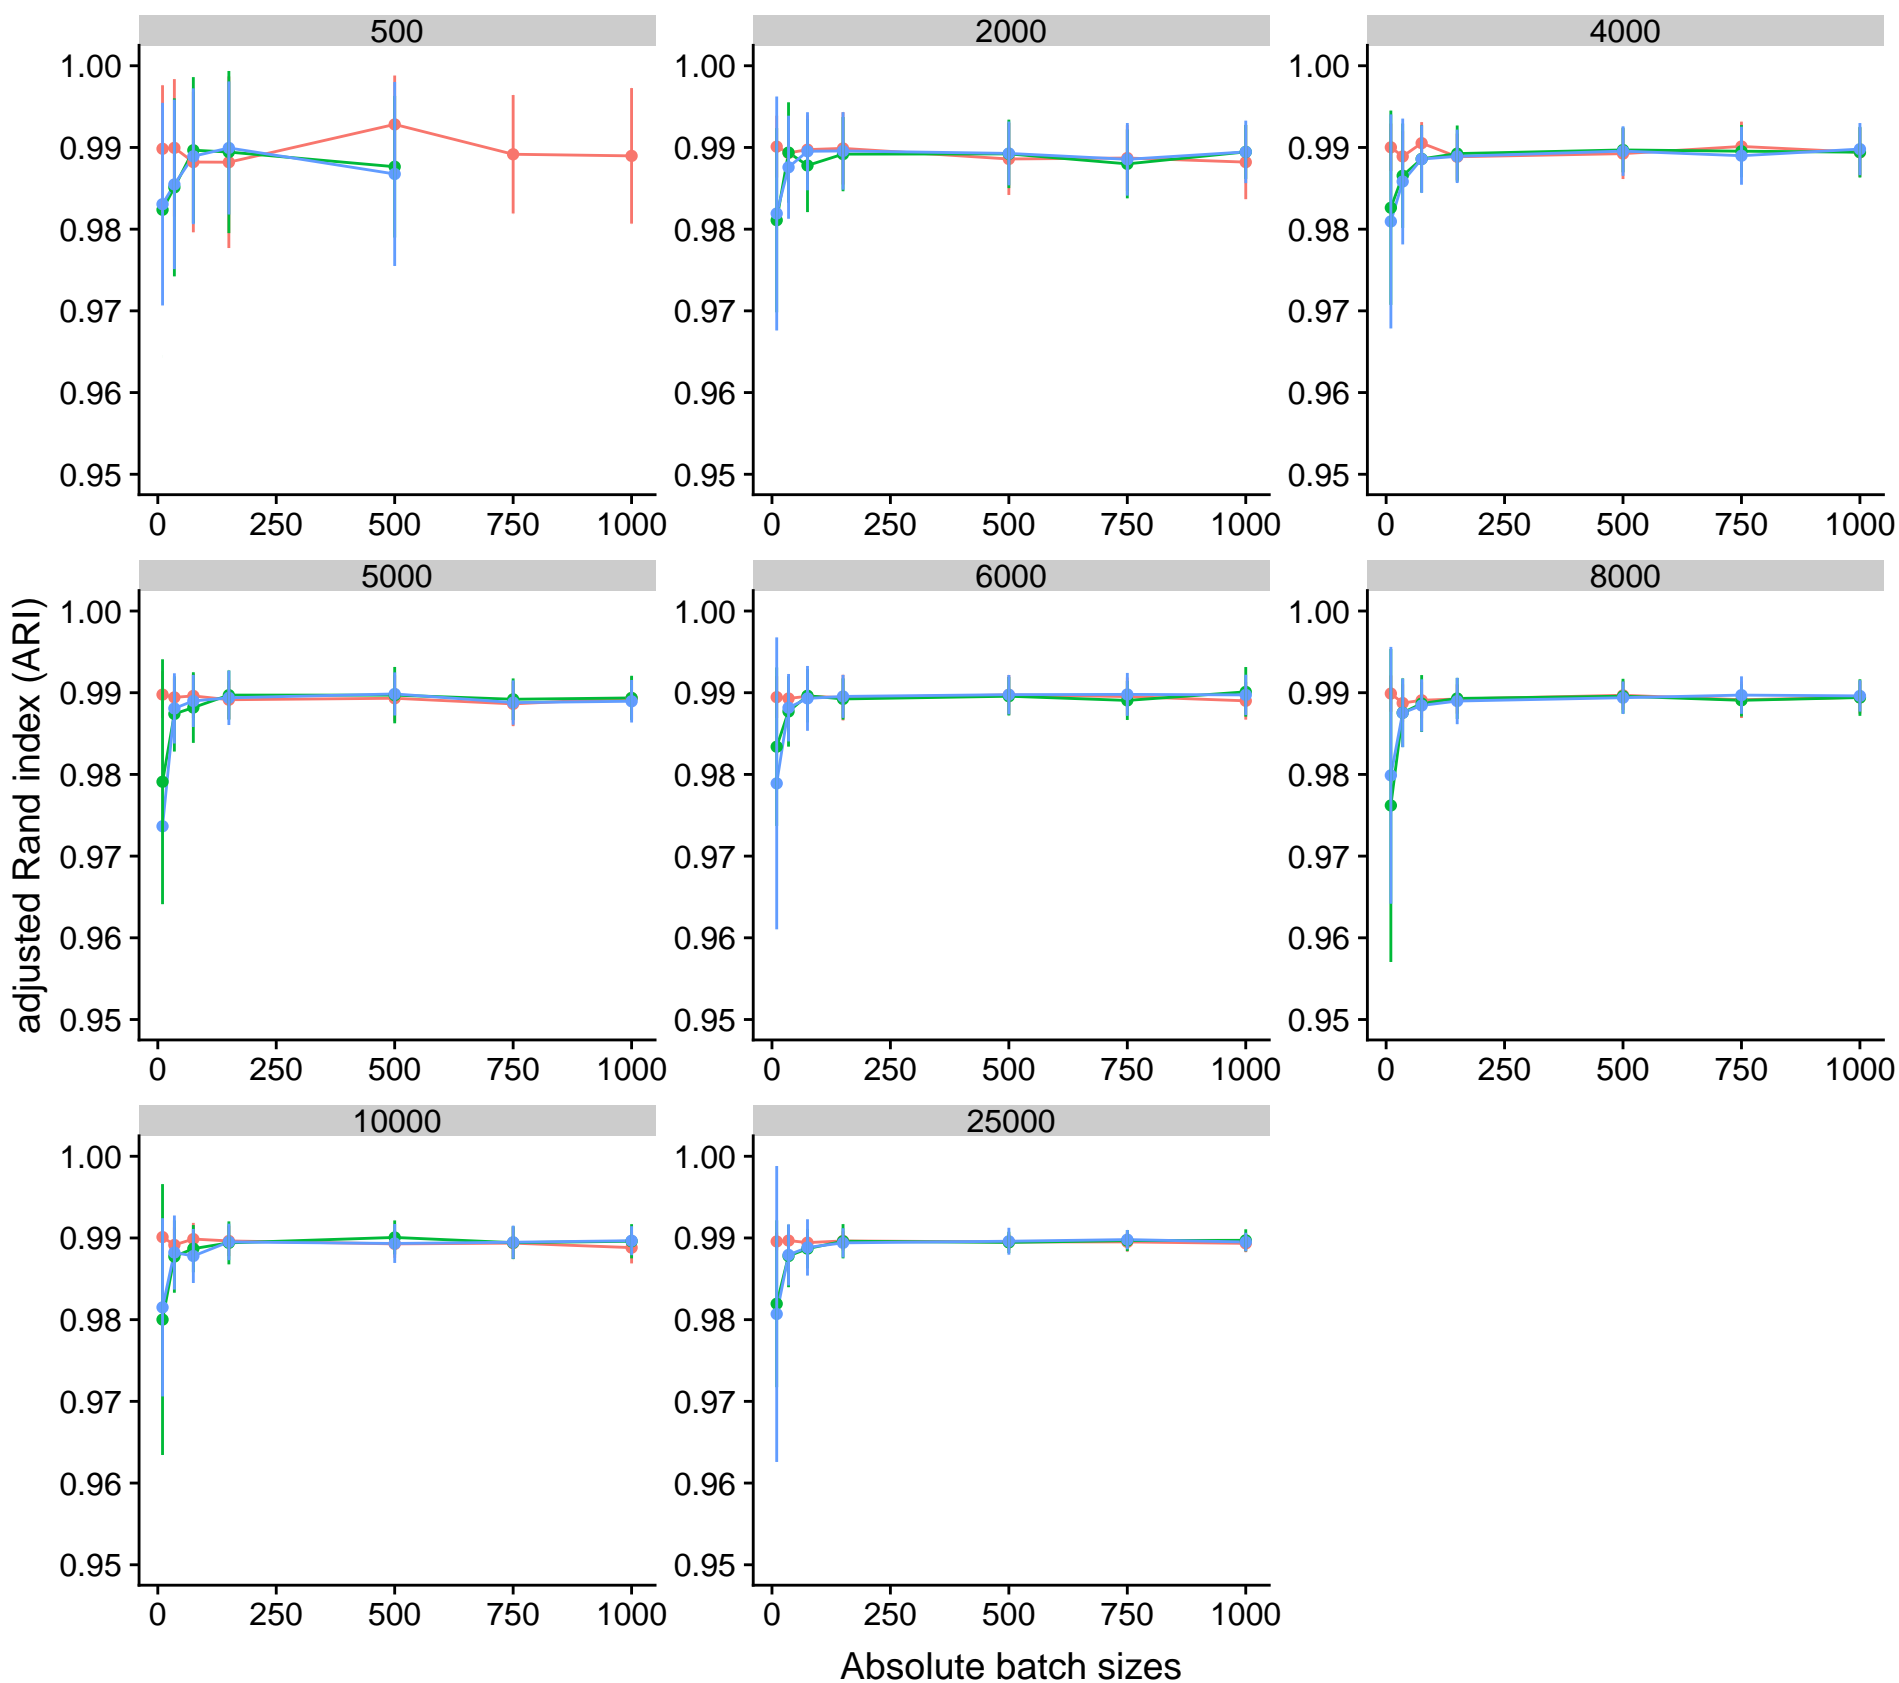

Supplement: S3 (10.1371/journal.pcbi.1008625.s003) [file journal.pcbi.1008625.s003]
