# Supplementary material for: mbkmeans: Fast clustering for single cell data using mini-batch k-means
Source: PLOS journal article supplement (doi:10.1371/journal.pcbi.1008625), 2021-01-26

Algorithm    ● k-means    ● mbkmeans    ● mbkmeans (HDF5)

**A**

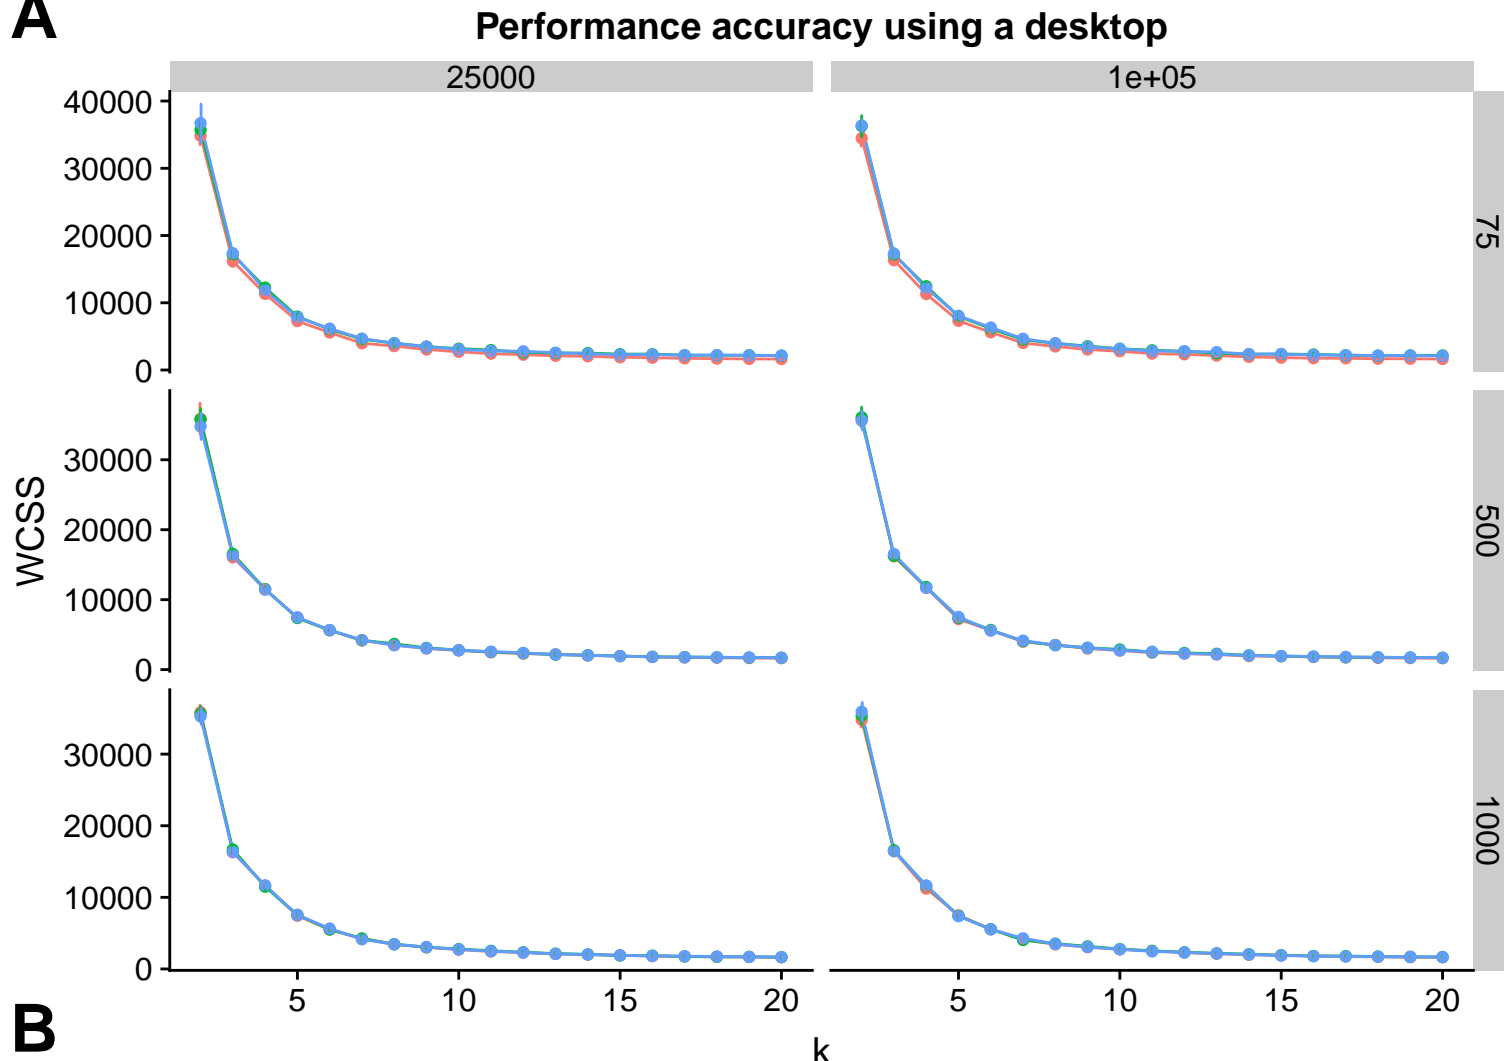

**B**

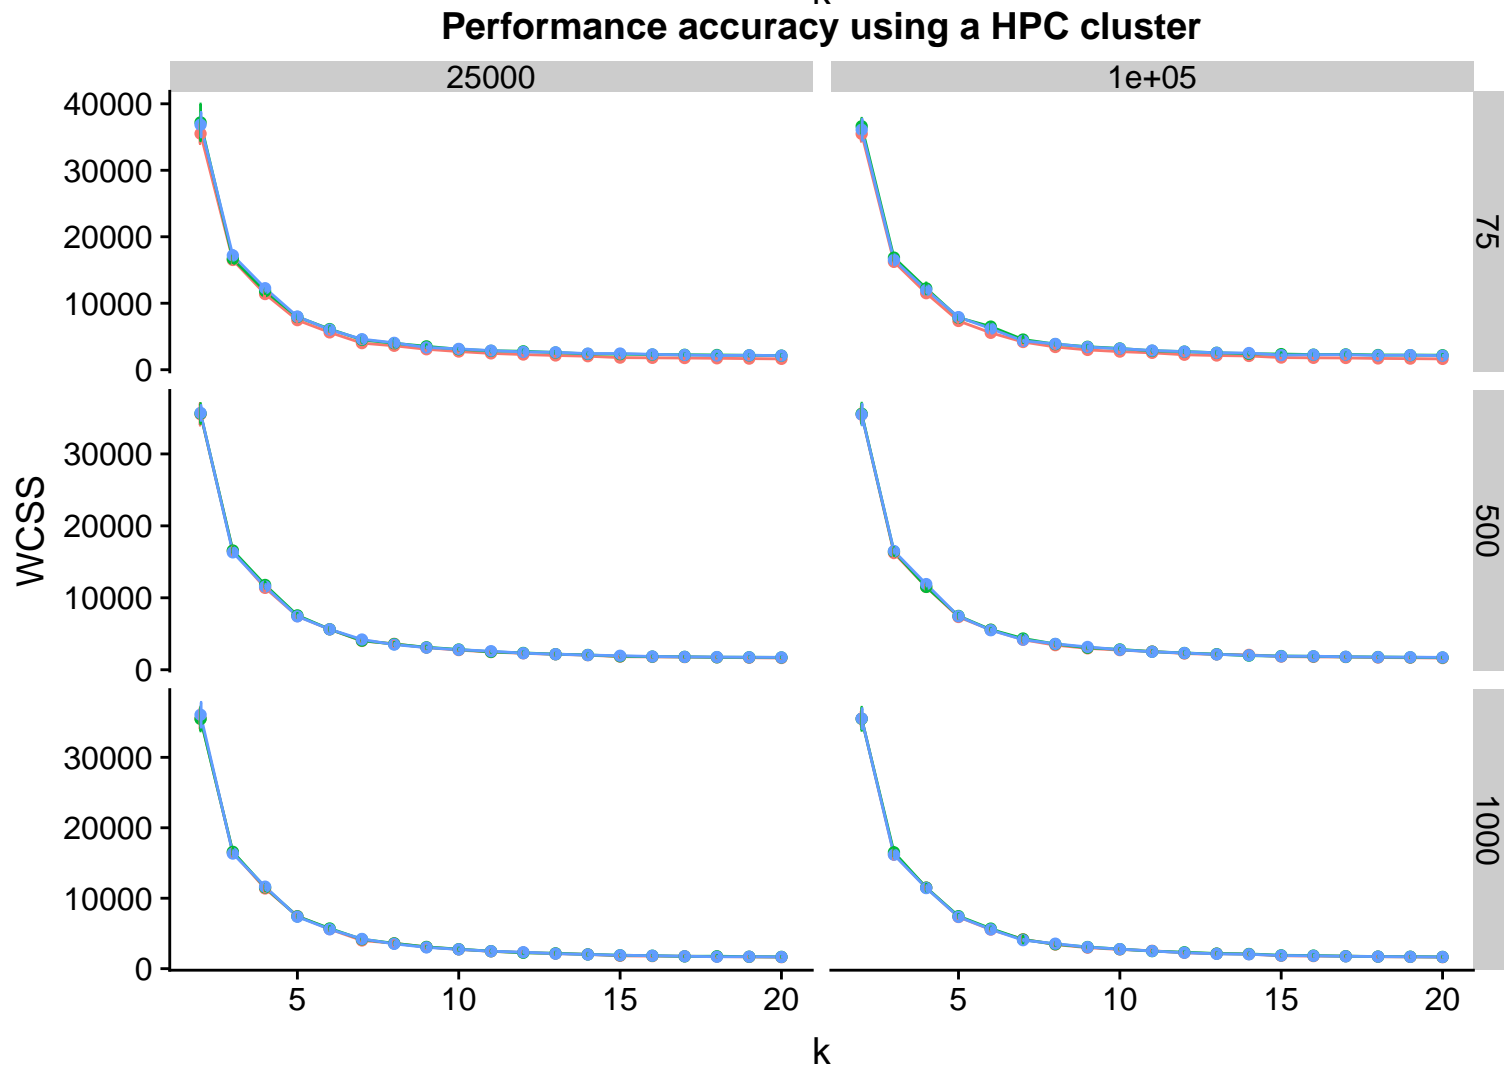

Supplement: S10 (10.1371/journal.pcbi.1008625.s010) [file journal.pcbi.1008625.s010]
